# Supplementary material
Source: MDPI journal article supplement (https://www.mdpi.com/search?q=metals-06-00200)
Supplement: s001 [file metals-06-00200-s001.pdf]

# Supplementary Materials: Molecular Docking and Aberration-Corrected STEM of Palladium Nanoparticles on Viral Templates

Liliana Carreño-Fuentes, Daniel Bahena, Laura A. Palomares, Octavio T. Ramírez, Miguel José-Yacamán and Germán Plascencia-Villa

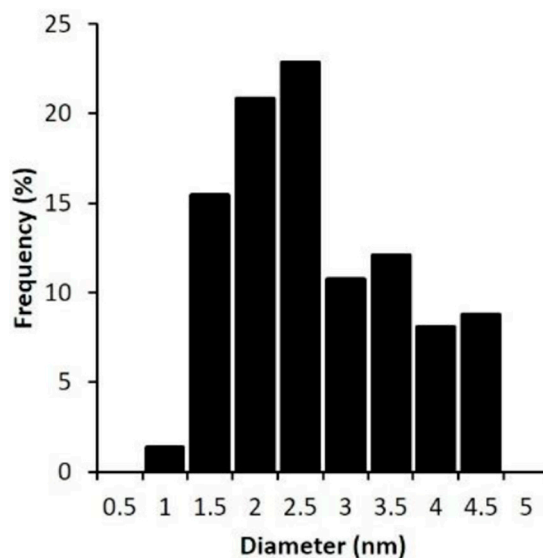

**Figure S1.** Histogram of Pd nanoparticles measured from atomic resolution Cs-STEM imaging. Mean diameter of  $2.5 \pm 1.02$  nm, size range from 1 to 5 nm.

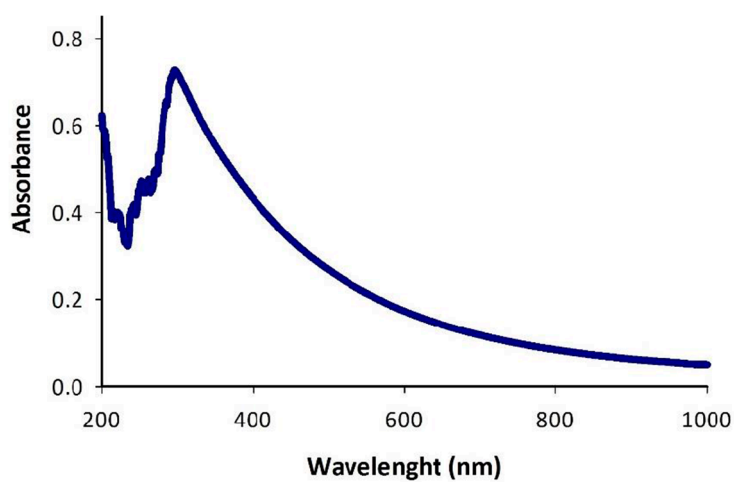

**Figure S2.** Absorbance spectroscopy. UV-Vis absorption spectra of VP6 nanotubes functionalized with Pd nanoparticles.

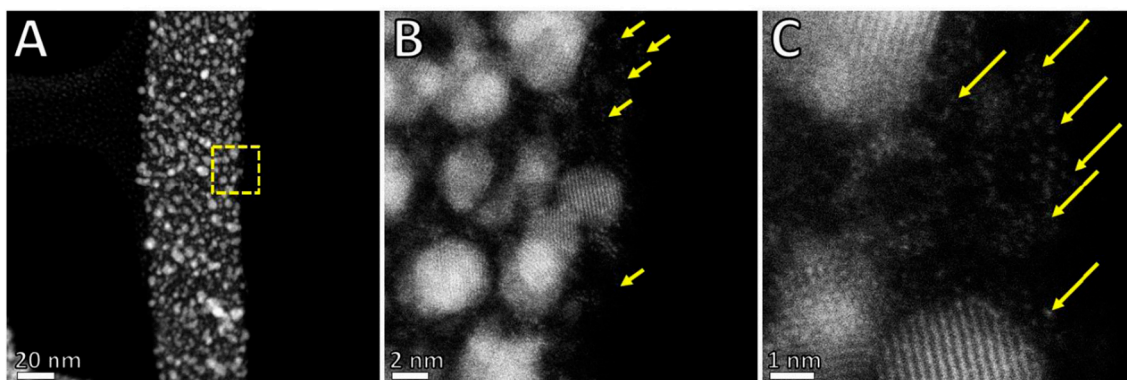

**Figure S3.** Atomic resolution Cs-STEM imaging. (A) HAADF-STEM imaging. (B) High magnification HAADF-STEM imaging region indicated in (A). (C) High magnification HAADF-STEM imaging region indicated in (B). Imaging with JEM ARM-200F (JEOL), operated at accelerating voltage of 80 kV in STEM mode.

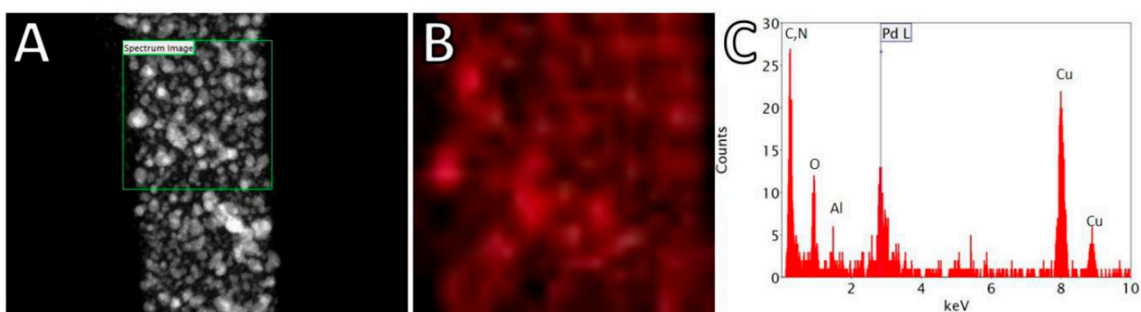

**Figure S4.** Atomic resolution Cs-STEM imaging and EDX mapping. (A) HAADF-STEM imaging. (B) EDX mapping of Pd of region indicated in (A). (C) EDX spectra corresponding to region indicated in (A). Imaging with JEM ARM-200F (JEOL), operated at accelerating voltage of 80 kV in STEM mode.
